# Supplementary material for: Impact of “Killer Immunoglobulin-Like Receptor /Ligand” Genotypes on Outcome following Surgery among Patients with Colorectal Cancer: Activating KIRs Are Associated with Long-Term Disease Free Survival
Source: PubMed Central journal article supplement (PMC4504472; doi:10.1371/journal.pone.0132526), 2015-07-16
Supplement: pone.0132526.s001.pdf [file pone.0132526.s001.pdf]

|  |
|--|
|  |
|  |
|  |
|  |
|  |
|  |
|  |
|  |
|  |

|                        |                                           |                                        |
|------------------------|-------------------------------------------|----------------------------------------|
|                        | <b>2</b>                                  | <b>both activating and inhibitory</b>  |
|                        | <b>3</b>                                  | <b>either KIR or ligand is missing</b> |
| <b>*</b>               | <b>Ligand is HLA-G</b>                    |                                        |
| <b>**</b>              | <b>Ligand is HLA-A*03, HLA-A*11</b>       |                                        |
| <b>A-<br/>Bw<br/>4</b> | <b>HLA-A (A23, A24, A25, A32,...) Bw4</b> |                                        |
|                        |                                           |                                        |
|                        | <b>is universally present</b>             |                                        |

Supplemental Table-1: KIR and KIR ligand data of each individual who have had recurrence
